# Supplementary material
Source: publisher figshare collection journal article supplement (https://tandf.figshare.com/ndownloader/files/12804989)
Supplement: Supplementary file 1 [file 12804989]

| **Table S1.** Primers used in this study. | | |  |
| --- | --- | --- | --- |
|  |  |  |  |
| Primers used for RT-PCR | |  |  |
| Gene/primer | AGI* code | Forward Primer 5' - 3' | Reverse Primer 5' - 3' |
| *bZIP60s* | AT1G42990 | GAAGGAGACGATGATGCTGTGGCT | AGCAGGGAACCCAACAGCAGACT |
| *bZIP60* | AT1G42990 | ATGGCGGAGGAATTTGGAAGC | TCACGCCGCAAGGGTTAAGAT |
| *bZIP60NR* | AT1G42990 | **/** | ATCCGGTGAAGACTGAAGAAAATC |
| *bZIP60CF* | AT1G42990 | CCCTTATATGTCCCACACAAAG | **/** |
| *IRE1B* | AT5G24360 | ATGACAAATCTATCTCCAATCAAATCT | CTACTCGAGGAATACAGTGGTCTTAGAGTACTTGAAAAA |
| *actin 2* | AT3G18780 | GGAAGGATCTGTACGGTAAC | GGACCTGCCTCATCATACT |
|  |  |  |  |
| Primers used for genotyping | |  |  |
| T-DNA primers | | 5' - 3' |  |
| LBa1 | | TGGTTCACGTAGTGGGCCATCG |  |
| pAC161-LB1 | | CAAGGCATCGATCGTGAAGTTTC |  |
|  |  |  |  |
| Primers used for cloning | |  |  |
| Gene | AGI code | Forward Primer 5' - 3' | Reverse Primer 5' - 3' |
| *PRX34* | AT3G49120 | CGCGGATCCATGCATTTCTCTTCGTCTTCA | CGCGTCGACTCACATAGAGCTAACAAAGTCAAC |
| *PR4* | AT3G04720 | CGCGGATCCATGAAGATCAGACTTAGCATAACCA | CCGCTCGAGTCAAACGCGATCAATGGCC |
| *ROSY1/ML* | AT2G16005 | CGCGGATCCATGGCGATATCTCACACCC | CGCGTCGACTCACTCGGTAACTTGATTAATCAT |
| *BGLU21* | AT1G66270 | CGCGGATCCATGGCATTGCAAAAGTTTCCT | CGCGTCGACTTAAAGCTCATCCCTCTTGAGTG |
| *PR-14* | AT5G01870 | CGCGGATCCATGATGAGAGTTGTGTTACCACTA | CGCGTCGACTCACTTAATGCTGTTGCAGTTG |
| *PROX-P* | AT2G38390 | CGCGGATCCATGGGGTTTTCGTCTTCATT | CGCGTCGACTCAGATAGAACTCACAACACCATC |
| *PROX-S* | AT4G36430 | CGCGGATCCATGGCAAGACTCACGAGCTT | CGCGTCGACTCAAGAGTTAATCTTCCTGCAATT |
| *VSP1* | AT5G24780 | CGCGGATCCATGAAAATCCTCTCACTTTCACT | CGCGTCGACTTAAGAAGGTACGTAGTAGAGTGG |
| *CTS1* | AT2G43620 | CGCGGATCCATGGCTACCCTAAGAGCAATGT | CGCGTCGACTTAGCAACTAAGATTTGCTCCA |
| *GLH19* | AT2G43610 | CGCGGATCCATGGCGACACAAAATGCGAT | CGCGTCGACTCAACATGAGAGATTGGTTCCAG |
| *PME41* | AT4G02330 | CGCGGATCCATGCTATCTCTCAAACTCTTCC | CCGCTCGAGTTACGAAAGTAAACCACTAATATAA |
| *mROSY1/mML* | AT2G16005 | CGCGGATCCATGCGCGATATCTCACACCC | CGCGTCGACTCACTCGGTAACTTGATTAATCAT |
| *mPR-14* | AT5G01870 | CGCGGATCCATGATCGGAGAGTTGTGTTACCACTA | CGCGTCGACTCACTTAATGCTGTTGCAGTTG |
| *mBGLU21* | AT1G66270 | CGCGGATCCATGCGCATTGCAAAAGTTTCCT | CGCGTCGACTTAAAGCTCATCCCTCTTGAGTG |

*AGI, Arabidopsis Genome Initiative
